# Supplementary material for: Analysis of Gene Expression in 3D Spheroids Highlights a Survival Role for ASS1 in Mesothelioma
Source: PubMed Central journal article supplement (PMC4794185; doi:10.1371/journal.pone.0150044), 2016-03-16
Supplement: pone.0150044.s003.pdf [file pone.0150044.s003.pdf]

Table S1 | **Upregulated genes in mesothelioma spheroids**

| <b>Gene Symbol</b> | <b>Description</b>                                                                                                     | <b>Unigene ID</b> |
|--------------------|------------------------------------------------------------------------------------------------------------------------|-------------------|
| <i>ABCG2</i>       | ATP-binding cassette, sub-family G (WHITE), member 2                                                                   | Hs.480218         |
| <i>ADD3</i>        | adducin 3 (gamma)                                                                                                      | Hs.501012         |
| <i>AKR1B1</i>      | aldo-keto reductase family 1, member B1 (aldose reductase)                                                             | Hs.521212         |
| <i>AKR1B10</i>     | aldo-keto reductase family 1, member B10 (aldose reductase)                                                            | Hs.116724         |
| <i>AKR1C1</i>      | aldo-keto reductase family 1, member C1 (dihydrodiol dehydrogenase 1; 20-alpha (3-alpha)-hydroxysteroid dehydrogenase) | Hs.460260         |
| <i>ANXA4</i>       | annexin A4                                                                                                             | Hs.422986         |
| <i>APOBEC3C</i>    | apolipoprotein B mRNA editing enzyme, catalytic polypeptide-like 3C                                                    | Hs.441124         |
| <i>APOBEC3G</i>    | apolipoprotein B mRNA editing enzyme, catalytic polypeptide-like 3G                                                    | Hs.474853         |
| <i>APOL1</i>       | apolipoprotein L, 1                                                                                                    | Hs.114309         |
| <i>APOL6</i>       | apolipoprotein L, 6                                                                                                    | Hs.257352         |
| <i>AQP3</i>        | aquaporin 3 (Gill blood group)                                                                                         | Hs.234642         |
| <i>ARL6IP5</i>     | ADP-ribosylation-like factor 6 interacting protein 5                                                                   | Hs.518060         |
| <i>ASS1</i>        | argininosuccinate synthetase 1                                                                                         | Hs.160786         |
| <i>ATF3</i>        | activating transcription factor 3                                                                                      | Hs.460            |
| <i>ATXN1</i>       | ataxin 1                                                                                                               | Hs.434961         |
| <i>B2M</i>         | beta-2-microglobulin                                                                                                   | Hs.48516          |
| <i>BST2</i>        | bone marrow stromal cell antigen 2                                                                                     | Hs.118110         |
| <i>BTN3A1</i>      | butyrophilin, subfamily 3, member A1                                                                                   | Hs.191510         |
| <i>BTN3A3</i>      | butyrophilin, subfamily 3, member A3                                                                                   | Hs.167741         |
| <i>C10orf39</i>    | chromosome 10 open reading frame 39                                                                                    | Hs.106254         |
| <i>C15orf48</i>    | chromosome 15 open reading frame 48                                                                                    | Hs.112242         |
| <i>C16orf45</i>    | chromosome 16 open reading frame 45                                                                                    | Hs.460095         |
| <i>C1R</i>         | complement component 1, r subcomponent                                                                                 | Hs.376414         |
| <i>C3orf34</i>     | chromosome 3 open reading frame 34                                                                                     | Hs.334526         |
| <i>CAPG</i>        | capping protein (actin filament), gelsolin-like                                                                        | Hs.516155         |
| <i>CARD6</i>       | caspase recruitment domain family, member 6                                                                            | Hs.200242         |
| <i>CAT</i>         | catalase                                                                                                               | Hs.502302         |
| <i>CD9</i>         | CD9 molecule                                                                                                           | Hs.114286         |
| <i>CLU</i>         | clusterin                                                                                                              | Hs.436657         |
| <i>CRABP2</i>      | cellular retinoic acid binding protein 2                                                                               | Hs.405662         |
| <i>CTH</i>         | cystathionase (cystathionine gamma-lyase)                                                                              | Hs.19904          |
| <i>CYP1B1</i>      | cytochrome P450, family 1, subfamily B, polypeptide 1                                                                  | Hs.154654         |
| <i>DDIT4</i>       | DNA-damage-inducible transcript 4                                                                                      | Hs.523012         |
| <i>DHRS3</i>       | dehydrogenase/reductase (SDR family) member 3                                                                          | Hs.289347         |
| <i>DOCK11</i>      | dedicator of cytokinesis 11                                                                                            | Hs.368203         |
| <i>ECH1</i>        | enoyl Coenzyme A hydratase 1, peroxisomal                                                                              | Hs.196176         |
| <i>ELF3</i>        | E74-like factor 3 (ets domain transcription factor, epithelial-specific)                                               | Hs.67928          |
| <i>EPHX1</i>       | epoxide hydrolase 1, microsomal (xenobiotic)                                                                           | Hs.89649          |
| <i>FA2H</i>        | fatty acid 2-hydroxylase                                                                                               | Hs.461329         |
| <i>FADS2</i>       | fatty acid desaturase 2                                                                                                | Hs.502745         |
| <i>FAM26B</i>      | family with sequence similarity 26, member B                                                                           | Hs.241545         |
| <i>FAM46A</i>      | family with sequence similarity 46, member A                                                                           | Hs.10784          |
| <i>FAM46A</i>      | family with sequence similarity 46, member A                                                                           | Hs.10784          |
| <i>FLJ13236</i>    | hypothetical protein FLJ13236                                                                                          | Hs.170298         |
| <i>FLJ20273</i>    | RNA-binding protein                                                                                                    | Hs.518727         |
| <i>FLJ20920</i>    | hypothetical protein FLJ20920                                                                                          | Hs.288959         |
| <i>FLJ22675</i>    | hypothetical gene supported by AK026328                                                                                | Hs.232604         |
| <i>GLRX</i>        | glutaredoxin (thioltransferase)                                                                                        | Hs.28988          |
| <i>GNG11</i>       | guanine nucleotide binding protein (G protein), gamma 11                                                               | Hs.83381          |
| <i>GNG2</i>        | guanine nucleotide binding protein (G protein), gamma 2                                                                | Hs.187772         |
| <i>GOT1</i>        | glutamic-oxaloacetic transaminase 1, soluble (aspartate aminotransferase 1)                                            | Hs.500756         |
| <i>GPNUMB</i>      | glycoprotein (transmembrane) numb                                                                                      | Hs.190495         |
| <i>GSN</i>         | gelsolin (amyloidosis, Finnish type)                                                                                   | Hs.522373         |
| <i>HDLBP</i>       | high density lipoprotein binding protein (vigilin)                                                                     | Hs.471851         |
| <i>HLA-G</i>       | HLA-G histocompatibility antigen, class I, G                                                                           | Hs.512152         |
| <i>IDH1</i>        | isocitrate dehydrogenase 1 (NADP+), soluble                                                                            | Hs.11223          |
| <i>IFI35</i>       | interferon-induced protein 35                                                                                          | Hs.50842          |
| <i>IFIT1</i>       | interferon-induced protein with tetratricopeptide repeats 1                                                            | Hs.20315          |
| <i>IGFBP6</i>      | insulin-like growth factor binding protein 6                                                                           | Hs.274313         |
| <i>IL17RC</i>      | interleukin 17 receptor C                                                                                              | Hs.129959         |
| <i>INSIG1</i>      | insulin induced gene 1                                                                                                 | Hs.520819         |
| <i>KIAA0274</i>    | KIAA0274                                                                                                               | Hs.529959         |
| <i>KLF9</i>        | Kruppel-like factor 9                                                                                                  | Hs.150557         |
| <i>KLK6</i>        | kallikrein 6 (neurosin, zyme)                                                                                          | Hs.79361          |
| <i>LAMA3</i>       | laminin, alpha 3                                                                                                       | Hs.436367         |
| <i>LOC285943</i>   | hypothetical protein LOC285943                                                                                         | Hs.520721         |
| <i>LPAAT-THETA</i> | lysophosphatidic acid acyltransferase theta                                                                            | Hs.99196          |
| <i>LXN</i>         | latexin                                                                                                                | Hs.478067         |
| <i>MAGED2</i>      | melanoma antigen family D, 2                                                                                           | Hs.4943           |
| <i>MAP1A</i>       | microtubule-associated protein 1A                                                                                      | Hs.194301         |
| <i>METTL7A</i>     | methyltransferase like 7A                                                                                              | Hs.288771         |
| <i>MGC16075</i>    | hypothetical protein MGC16075                                                                                          | Hs.334508         |
| <i>MMP2</i>        | matrix metalloproteinase 2 (gelatinase A, 72kDa gelatinase, 72kDa type IV collagenase)                                 | Hs.513617         |
| <i>MVP</i>         | major vault protein                                                                                                    | Hs.513488         |
| <i>NCOA7</i>       | nuclear receptor coactivator 7                                                                                         | Hs.171426         |

|                 |                                                                                                 |           |
|-----------------|-------------------------------------------------------------------------------------------------|-----------|
| <i>NDRG1</i>    | N-myc downstream regulated gene 1                                                               | Hs.372914 |
| <i>NEBL</i>     | nebullette                                                                                      | Hs.5025   |
| <i>NFE2</i>     | nuclear factor (erythroid-derived 2), 45kDa                                                     | Hs.75643  |
| <i>NFKBIA</i>   | nuclear factor of kappa light polypeptide gene enhancer in B-cells inhibitor, alpha             | Hs.81328  |
| <i>NMNAT2</i>   | nicotinamide nucleotide adenyltransferase 2                                                     | Hs.497123 |
| <i>NOV</i>      | nephroblastoma overexpressed gene                                                               | Hs.235935 |
| <i>NR1H3</i>    | nuclear receptor subfamily 1, group H, member 3                                                 | Hs.438863 |
| <i>NULL</i>     | NULL                                                                                            | Hs.535320 |
| <i>OAS1</i>     | 2',5'-oligoadenylate synthetase 1, 40/46kDa                                                     | Hs.524760 |
| <i>OLIG2</i>    | oligodendrocyte lineage transcription factor 2                                                  | Hs.176977 |
| <i>OPTN</i>     | optineurin                                                                                      | Hs.332706 |
| <i>P4HA2</i>    | procollagen-proline, 2-oxoglutarate 4-dioxygenase (proline 4-hydroxylase), alpha polypeptide II | Hs.519568 |
| <i>PC</i>       | pyruvate carboxylase                                                                            | Hs.89890  |
| <i>PDCD4</i>    | programmed cell death 4 (neoplastic transformation inhibitor)                                   | Hs.232543 |
| <i>PGM1</i>     | phosphoglucomutase 1                                                                            | Hs.1869   |
| <i>PIR</i>      | pirin (iron-binding nuclear protein)                                                            | Hs.495728 |
| <i>POR</i>      | P450 (cytochrome) oxidoreductase                                                                | Hs.354056 |
| <i>PPARA</i>    | peroxisome proliferative activated receptor, alpha                                              | Hs.103110 |
| <i>PPARA</i>    | peroxisome proliferative activated receptor, alpha                                              | Hs.275711 |
| <i>PPARG</i>    | peroxisome proliferative activated receptor, gamma                                              | Hs.162646 |
| <i>PPP1R1A</i>  | protein phosphatase 1, regulatory (inhibitor) subunit 1A                                        | Hs.505662 |
| <i>PSMB10</i>   | proteasome (prosome, macropain) subunit, beta type, 10                                          | Hs.9661   |
| <i>PTGES</i>    | prostaglandin E synthase                                                                        | Hs.146688 |
| <i>QPRT</i>     | quinolinate phosphoribosyltransferase (nicotinate-nucleotide pyrophosphorylase (carboxylating)) | Hs.513484 |
| <i>RAB27B</i>   | RAB27B, member RAS oncogene family                                                              | Hs.25318  |
| <i>RAB31</i>    | RAB31, member RAS oncogene family                                                               | Hs.99528  |
| <i>RAB7B</i>    | RAB7B, member RAS oncogene family                                                               | Hs.534612 |
| <i>RAP1GAP</i>  | RAP1 GTPase activating protein                                                                  | Hs.148178 |
| <i>RARRES3</i>  | retinoic acid receptor responder (tazarotene induced) 3                                         | Hs.17466  |
| <i>RASSF4</i>   | Ras association (RalGDS/AF-6) domain family 4                                                   | Hs.522895 |
| <i>S100A3</i>   | S100 calcium binding protein A3                                                                 | Hs.433168 |
| <i>S100A4</i>   | S100 calcium binding protein A4                                                                 | Hs.81256  |
| <i>S100A6</i>   | S100 calcium binding protein A6                                                                 | Hs.275243 |
| <i>SCD</i>      | stearoyl-CoA desaturase (delta-9-desaturase)                                                    | Hs.368641 |
| <i>SCNN1A</i>   | sodium channel, nonvoltage-gated 1 alpha                                                        | Hs.130989 |
| <i>SDCBP</i>    | syndecan binding protein (syntenin)                                                             | Hs.200804 |
| <i>SERPINB1</i> | serpin peptidase inhibitor, clade B (ovalbumin), member 1                                       | Hs.381167 |
| <i>SLC2A3</i>   | solute carrier family 2 (facilitated glucose transporter), member 3                             | Hs.419240 |
| <i>SLC9A3R1</i> | solute carrier family 9 (sodium/hydrogen exchanger), member 3 regulator 1                       | Hs.396783 |
| <i>SMAD3</i>    | SMAD, mothers against DPP homolog 3 (Drosophila)                                                | Hs.99843  |
| <i>SNCG</i>     | synuclein, gamma (breast cancer-specific protein 1)                                             | Hs.349470 |
| <i>SSBP2</i>    | single-stranded DNA binding protein 2                                                           | Hs.102735 |
| <i>STC1</i>     | stanniocalcin 1                                                                                 | Hs.25590  |
| <i>SULF2</i>    | sulfatase 2                                                                                     | Hs.162016 |
| <i>SYNPO</i>    | synaptopodin                                                                                    | Hs.435228 |
| <i>TCN2</i>     | transcobalamin II; macrocytic anemia                                                            | Hs.417948 |
| <i>TGFBR2</i>   | transforming growth factor, beta receptor II (70/80kDa)                                         | Hs.82028  |
| <i>TIMP3</i>    | TIMP metalloproteinase inhibitor 3 (Sorsby fundus dystrophy, pseudoinflammatory)                | Hs.297324 |
| <i>TIMP4</i>    | TIMP metalloproteinase inhibitor 4                                                              | Hs.549073 |
| <i>TLR3</i>     | toll-like receptor 3                                                                            | Hs.29499  |
| <i>TLR4</i>     | toll-like receptor 4                                                                            | Hs.174312 |
| <i>TMEM140</i>  | transmembrane protein 140                                                                       | Hs.521215 |
| <i>TNFRSF9</i>  | tumor necrosis factor receptor superfamily, member 9                                            | Hs.193418 |
| <i>TNIK</i>     | TRAF2 and NCK interacting kinase                                                                | Hs.34024  |
| <i>TP53INP2</i> | tumor protein p53 inducible nuclear protein 2                                                   | Hs.516994 |
| <i>TPBG</i>     | trophoblast glycoprotein                                                                        | Hs.82128  |
| <i>TPD52L1</i>  | tumor protein D52-like 1                                                                        | Hs.201482 |
| <i>TSC22D1</i>  | TSC22 domain family, member 1                                                                   | Hs.507916 |
| <i>TSC22D3</i>  | TSC22 domain family, member 3                                                                   | Hs.522074 |
| <i>UBE2L6</i>   | ubiquitin-conjugating enzyme E2L 6                                                              | Hs.425777 |
| <i>VAMP5</i>    | vesicle-associated membrane protein 5 (myobrevin)                                               | Hs.172684 |
| <i>VAV3</i>     | vav 3 oncogene                                                                                  | Hs.267659 |
| <i>WNT6</i>     | wingless-type MMTV integration site family, member 6                                            | Hs.29764  |

Genes upregulated in all three mesothelioma cell lines (M28, REN, VAMT) in spheroids compared to monolayers with Bonferoni adjusted  $P < 0.05$ .
