# Supplementary material for: Analysis of Gene Expression in 3D Spheroids Highlights a Survival Role for ASS1 in Mesothelioma
Source: PubMed Central journal article supplement (PMC4794185; doi:10.1371/journal.pone.0150044), 2016-03-16
Supplement: pone.0150044.s004.pdf [file pone.0150044.s004.pdf]

Table S2 | Downregulated genes in mesothelioma spheroids

| Gene Symbol     | Description                                                                                   | Unigene ID |
|-----------------|-----------------------------------------------------------------------------------------------|------------|
| <i>AADACL1</i>  | arylacetylamine deacetylase-like 1                                                            | Hs.444099  |
| <i>ADRB2</i>    | adrenergic, beta-2-, receptor, surface                                                        | Hs.2551    |
| <i>AMOTL2</i>   | angiomin like 2                                                                               | Hs.426312  |
| <i>ANKRD1</i>   | ankyrin repeat domain 1 (cardiac muscle)                                                      | Hs.448589  |
| <i>ANKRD13A</i> | ankyrin repeat domain 13A                                                                     | Hs.528703  |
| <i>ANKRD2</i>   | ankyrin repeat domain 2 (stretch responsive muscle)                                           | Hs.73708   |
| <i>ANXA3</i>    | annexin A3                                                                                    | Hs.480042  |
| <i>AXL</i>      | AXL receptor tyrosine kinase                                                                  | Hs.466791  |
| <i>C12orf24</i> | chromosome 12 open reading frame 24                                                           | Hs.436618  |
| <i>C1orf33</i>  | chromosome 1 open reading frame 33                                                            | Hs.463797  |
| <i>C1orf79</i>  | chromosome 1 open reading frame 79                                                            | Hs.40092   |
| <i>CAD</i>      | carbamoyl-phosphate synthetase 2, aspartate transcarbamylase, and dihydroorotase              | Hs.377010  |
| <i>CCBE1</i>    | collagen and calcium binding EGF domains 1                                                    | Hs.34333   |
| <i>CCDC85A</i>  | coiled-coil domain containing 85A                                                             | Hs.117136  |
| <i>CGI-115</i>  | CGI-115 protein                                                                               | Hs.408101  |
| <i>CTGF</i>     | connective tissue growth factor                                                               | Hs.410037  |
| <i>CYR61</i>    | cysteine-rich, angiogenic inducer, 61                                                         | Hs.8867    |
| <i>DIO2</i>     | deiodinase, iodothyronine, type II                                                            | Hs.202354  |
| <i>DLX2</i>     | distal-less homeobox 2                                                                        | Hs.419     |
| <i>EDN1</i>     | endothelin 1                                                                                  | Hs.511899  |
| <i>EPHB2</i>    | EPH receptor B2                                                                               | Hs.523329  |
| <i>F3</i>       | coagulation factor III (thromboplastin, tissue factor)                                        | Hs.62192   |
| <i>FGF2</i>     | fibroblast growth factor 2 (basic)                                                            | Hs.284244  |
| <i>FGFR2</i>    | fibroblast growth factor receptor 2                                                           | Hs.533683  |
| <i>FJX1</i>     | four jointed box 1 (Drosophila)                                                               | Hs.39384   |
| <i>FST</i>      | follicle-stimulating hormone receptor                                                         | Hs.9914    |
| <i>GADD45A</i>  | growth arrest and DNA-damage-inducible, alpha                                                 | Hs.80409   |
| <i>GTPBP4</i>   | GTP binding protein 4                                                                         | Hs.215766  |
| <i>IL11</i>     | interleukin 11                                                                                | Hs.467304  |
| <i>KIAA0690</i> | KIAA0690                                                                                      | Hs.434251  |
| <i>KISS1</i>    | KISS-1 metastasis-suppressor                                                                  | Hs.95008   |
| <i>KRT33B</i>   | keratin 33B                                                                                   | Hs.32950   |
| <i>LHB</i>      | lutetizing hormone beta polypeptide                                                           | Hs.154704  |
| <i>LOC56902</i> | putative 28 kDa protein                                                                       | Hs.262858  |
| <i>MKI67IP</i>  | MKI67 (FHA domain) interacting nucleolar phosphoprotein                                       | Hs.367842  |
| <i>MYBL1</i>    | v-myb myeloblastosis viral oncogene homolog (avian)-like 1                                    | Hs.445898  |
| <i>MYC</i>      | v-myc myelocytomatosis viral oncogene homolog (avian)                                         | Hs.202453  |
| <i>NEXN</i>     | nexilin (F actin binding protein)                                                             | Hs.22370   |
| <i>NIP7</i>     | nuclear import 7 homolog (S. cerevisiae)                                                      | Hs.501513  |
| <i>NPPB</i>     | natriuretic peptide precursor B                                                               | Hs.219140  |
| <i>NT5DC3</i>   | 5'-nucleotidase domain containing 3                                                           | Hs.48428   |
| <i>NT5E</i>     | 5'-nucleotidase, ecto (CD73)                                                                  | Hs.153952  |
| <i>NULL</i>     | NULL                                                                                          | Hs.82254   |
| <i>ODC1</i>     | ornithine decarboxylase 1                                                                     | Hs.467701  |
| <i>OXTR</i>     | oxytocin receptor                                                                             | Hs.2820    |
| <i>POLR3G</i>   | polymerase (RNA) III (DNA directed) polypeptide G (32kD)                                      | Hs.282387  |
| <i>POLR3G</i>   | polymerase (RNA) III (DNA directed) polypeptide G (32kD)                                      | Hs.282387  |
| <i>PPAT</i>     | phosphoribosyl pyrophosphate amidotransferase                                                 | Hs.331420  |
| <i>PPRC1</i>    | peroxisome proliferative activated receptor, gamma, coactivator-related 1                     | Hs.533551  |
| <i>PWP2H</i>    | PWP2 periodic tryptophan protein homolog (yeast)                                              | Hs.449076  |
| <i>RAD18</i>    | RAD18 homolog (S. cerevisiae)                                                                 | Hs.375684  |
| <i>RBM24</i>    | RNA binding motif protein 24                                                                  | Hs.519904  |
| <i>RGS7</i>     | regulator of G-protein signalling 7                                                           | Hs.130171  |
| <i>RRS1</i>     | RRS1 ribosome biogenesis regulator homolog (S. cerevisiae)                                    | Hs.71827   |
| <i>SCHIP1</i>   | schwannomin interacting protein 1                                                             | Hs.134665  |
| <i>SEC23B</i>   | Sec23 homolog B (S. cerevisiae)                                                               | Hs.369373  |
| <i>SERPINE1</i> | serpin peptidase inhibitor, clade E (nexin, plasminogen activator inhibitor type 1), member 1 | Hs.414795  |
| <i>SNORD22</i>  | small nucleolar RNA, C/D box 22                                                               | Hs.433345  |
| <i>STYK1</i>    | serine/threonine/tyrosine kinase 1                                                            | Hs.24979   |
| <i>TMEM166</i>  | transmembrane protein 166                                                                     | Hs.549210  |
| <i>TMEM16B</i>  | transmembrane protein 16B                                                                     | Hs.148970  |
| <i>UAP1</i>     | UDP-N-acetylglucosamine pyrophosphorylase 1                                                   | Hs.492859  |
| <i>WNT5B</i>    | wingless-type MMTV integration site family, member 5B                                         | Hs.306051  |
| <i>WWC1</i>     | WW, C2 and coiled-coil domain containing 1                                                    | Hs.484047  |
| <i>YRDC</i>     | yrdC domain containing (E. coli)                                                              | Hs.301564  |
| <i>ZC3H8</i>    | zinc finger CCCH-type containing 8                                                            | Hs.418416  |
| <i>ZFP30</i>    | zinc finger protein 30 homolog (mouse)                                                        | Hs.116622  |
| <i>ZFP36L2</i>  | zinc finger protein 36, C3H type-like 2                                                       | Hs.78909   |
| <i>ZNF569</i>   | zinc finger protein 569                                                                       | Hs.511848  |
| <i>ZNF695</i>   | zinc finger protein 695                                                                       | Hs.161840  |
| <i>ZNF714</i>   | zinc finger protein 714                                                                       | Hs.466291  |

Genes downregulated in all three mesothelioma cell lines (M28, REN, VAMT) in spheroids compared to monolayers with Bonferroni adjusted  $P < 0.05$ .
