# Supplementary material for: Analysis of Gene Expression in 3D Spheroids Highlights a Survival Role for ASS1 in Mesothelioma
Source: PubMed Central journal article supplement (PMC4794185; doi:10.1371/journal.pone.0150044), 2016-03-16
Supplement: pone.0150044.s005.pdf [file pone.0150044.s005.pdf]

Table S3 | **Ingenuity top diseases and bio functions**

| <b>Molecular and Cellular Functions</b>              |                     |              |
|------------------------------------------------------|---------------------|--------------|
| <b>Category</b>                                      | <b>PValue</b>       | <b>Count</b> |
| Cellular Growth and Proliferation                    | 5,81E-18 - 3,51E-04 | 108          |
| Cellular Movement                                    | 1,28E-17 - 4,42E-04 | 74           |
| Cell Death and Survival                              | 1,87E-15 - 4,18E-04 | 95           |
| Cellular Development                                 | 1,17E-13 - 3,51E-04 | 88           |
| Cell Morphology                                      | 1,28E-08 - 4,42E-04 | 65           |
| <b>Physiological System Development and Function</b> |                     |              |
| <b>Category</b>                                      | <b>PValue</b>       | <b>Count</b> |
| Tumor Morphology                                     | 3,54E-13 - 3,59E-04 | 47           |
| Immune Cell Trafficking                              | 6,03E-11 - 4,21E-04 | 39           |
| Tissue Morphology                                    | 2,53E-10 - 3,61E-04 | 65           |
| Cardiovascular System Development and Function       | 8,16E-10 - 3,77E-04 | 51           |
| Organismal Development                               | 8,16E-10 - 3,45E-04 | 69           |
| <b>Diseases and Disorders</b>                        |                     |              |
| <b>Category</b>                                      | <b>PValue</b>       | <b>Count</b> |
| Cancer                                               | 2,05E-18 - 3,82E-04 | 151          |
| Dermatological Diseases and Conditions               | 2,71E-13 - 3,39E-04 | 48           |
| Developmental Disorder                               | 4,51E-13 - 3,61E-04 | 31           |
| Organismal Injury and Abnormalities                  | 3,68E-12 - 3,61E-04 | 96           |
| Reproductive System Disease                          | 3,68E-12 - 3,59E-04 | 73           |

Ingenuity Top Molecular and Cellular Functions, Physiological System Development and Function and Diseases and Disorders for DE genes in mesothelioma spheroids.
