# Supplementary material for: Analysis of Gene Expression in 3D Spheroids Highlights a Survival Role for ASS1 in Mesothelioma
Source: PubMed Central journal article supplement (PMC4794185; doi:10.1371/journal.pone.0150044), 2016-03-16
Supplement: pone.0150044.s006.pdf [file pone.0150044.s006.pdf]

Table S4 | DAVID functional annotation chart

| Category        | Term                                                                            | Count | %    | PValue   | Fold Enrichment |
|-----------------|---------------------------------------------------------------------------------|-------|------|----------|-----------------|
| GOTERM_BP_FAT   | GO:0042127~regulation of cell proliferation                                     | 24    | 11.8 | 6.29E-05 | 2.53            |
| GOTERM_BP_FAT   | GO:0042060~wound healing                                                        | 11    | 5.4  | 1.00E-04 | 4.78            |
| GOTERM_BP_FAT   | GO:0032101~regulation of response to external stimulus                          | 10    | 4.9  | 1.25E-04 | 5.22            |
| INTERPRO        | IPR017891:Insulin-like growth factor binding protein, N-terminal                | 4     | 2.0  | 2.71E-04 | 30.02           |
| GOTERM_BP_FAT   | GO:0045596~negative regulation of cell differentiation                          | 11    | 5.4  | 2.74E-04 | 4.23            |
| GOTERM_BP_FAT   | GO:0010888~negative regulation of lipid storage                                 | 4     | 2.0  | 3.43E-04 | 27.66           |
| GOTERM_BP_FAT   | GO:0010745~negative regulation of foam cell differentiation                     | 4     | 2.0  | 3.43E-04 | 27.66           |
| SP_PIR_KEYWORDS | endoplasmic reticulum                                                           | 19    | 9.3  | 4.84E-04 | 2.55            |
| GOTERM_BP_FAT   | GO:0009611~response to wounding                                                 | 17    | 8.3  | 6.25E-04 | 2.66            |
| INTERPRO        | IPR006208:Cystine knot                                                          | 4     | 2.0  | 6.68E-04 | 22.51           |
| GOTERM_BP_FAT   | GO:0010033~response to organic substance                                        | 20    | 9.8  | 1.01E-03 | 2.30            |
| GOTERM_CC_FAT   | GO:0044421~extracellular region part                                            | 23    | 11.3 | 1.07E-03 | 2.11            |
| SMART           | SM00121:IB                                                                      | 4     | 2.0  | 1.11E-03 | 18.91           |
| UP_SEQ_FEATURE  | domain:IGFBP N-terminal                                                         | 4     | 2.0  | 1.13E-03 | 19.02           |
| UP_SEQ_FEATURE  | region of interest:Heparin-binding                                              | 4     | 2.0  | 1.13E-03 | 19.02           |
| INTERPRO        | IPR012395:IGFBP-related, CNN                                                    | 3     | 1.5  | 1.19E-03 | 54.03           |
| UP_SEQ_FEATURE  | binding site:Substrate                                                          | 11    | 5.4  | 1.19E-03 | 3.52            |
| GOTERM_BP_FAT   | GO:0051493~regulation of cytoskeleton organization                              | 8     | 3.9  | 1.24E-03 | 4.88            |
| INTERPRO        | IPR000867:Insulin-like growth factor-binding protein, IGFBP                     | 4     | 2.0  | 1.32E-03 | 18.01           |
| GOTERM_BP_FAT   | GO:0031099~regeneration                                                         | 6     | 2.9  | 1.40E-03 | 7.22            |
| GOTERM_BP_FAT   | GO:0050818~regulation of coagulation                                            | 5     | 2.5  | 1.42E-03 | 10.12           |
| GOTERM_BP_FAT   | GO:0042445~hormone metabolic process                                            | 7     | 3.4  | 1.71E-03 | 5.48            |
| GOTERM_BP_FAT   | GO:0046165~alcohol biosynthetic process                                         | 5     | 2.5  | 1.85E-03 | 9.43            |
| GOTERM_BP_FAT   | GO:0010883~regulation of lipid storage                                          | 4     | 2.0  | 1.91E-03 | 15.81           |
| PIR_SUPERFAMILY | PIRSF036495:IGFBP_rP_CNN                                                        | 3     | 1.5  | 2.05E-03 | 40.71           |
| GOTERM_BP_FAT   | GO:0010887~negative regulation of cholesterol storage                           | 3     | 1.5  | 2.07E-03 | 41.50           |
| GOTERM_CC_FAT   | GO:0005730~nucleolus                                                            | 18    | 8.8  | 2.19E-03 | 2.27            |
| GOTERM_BP_FAT   | GO:0010817~regulation of hormone levels                                         | 8     | 3.9  | 2.27E-03 | 4.40            |
| GOTERM_BP_FAT   | GO:0001558~regulation of cell growth                                            | 9     | 4.4  | 2.33E-03 | 3.85            |
| GOTERM_BP_FAT   | GO:0008219~cell death                                                           | 19    | 9.3  | 2.42E-03 | 2.19            |
| GOTERM_BP_FAT   | GO:0019748~secondary metabolic process                                          | 6     | 2.9  | 2.56E-03 | 6.30            |
| GOTERM_BP_FAT   | GO:0016265~death                                                                | 19    | 9.3  | 2.61E-03 | 2.18            |
| GOTERM_BP_FAT   | GO:0051240~positive regulation of multicellular organismal process              | 10    | 4.9  | 2.70E-03 | 3.40            |
| SP_PIR_KEYWORDS | duplication                                                                     | 9     | 4.4  | 2.72E-03 | 3.78            |
| GOTERM_MF_FAT   | GO:0005520~insulin-like growth factor binding                                   | 4     | 2.0  | 2.89E-03 | 13.76           |
| SP_PIR_KEYWORDS | metalloprotease inhibitor                                                       | 3     | 1.5  | 2.89E-03 | 35.89           |
| GOTERM_BP_FAT   | GO:0008202~steroid metabolic process                                            | 9     | 4.4  | 2.99E-03 | 3.70            |
| SP_PIR_KEYWORDS | lipoprotein                                                                     | 16    | 7.8  | 3.00E-03 | 2.38            |
| PIR_SUPERFAMILY | PIRSF036495:IGFBP-related protein, CNN type                                     | 3     | 1.5  | 3.05E-03 | 33.93           |
| GOTERM_BP_FAT   | GO:0010743~regulation of foam cell differentiation                              | 4     | 2.0  | 3.19E-03 | 13.28           |
| SP_PIR_KEYWORDS | polymorphism                                                                    | 140   | 68.6 | 3.38E-03 | 1.16            |
| SP_PIR_KEYWORDS | metalloenzyme inhibitor                                                         | 3     | 1.5  | 3.69E-03 | 31.90           |
| GOTERM_BP_FAT   | GO:0008285~negative regulation of cell proliferation                            | 12    | 5.9  | 4.15E-03 | 2.76            |
| GOTERM_BP_FAT   | GO:0032956~regulation of actin cytoskeleton organization                        | 6     | 2.9  | 4.28E-03 | 5.60            |
| GOTERM_CC_FAT   | GO:0005615~extracellular space                                                  | 17    | 8.3  | 4.44E-03 | 2.19            |
| SP_PIR_KEYWORDS | calcium binding                                                                 | 6     | 2.9  | 4.44E-03 | 5.57            |
| GOTERM_BP_FAT   | GO:0033043~regulation of organelle organization                                 | 9     | 4.4  | 4.62E-03 | 3.44            |
| GOTERM_BP_FAT   | GO:0052200~response to host defenses                                            | 3     | 1.5  | 4.86E-03 | 27.66           |
| GOTERM_BP_FAT   | GO:0052173~response to defenses of other organism during symbiotic interaction  | 3     | 1.5  | 4.86E-03 | 27.66           |
| GOTERM_BP_FAT   | GO:0075136~response to host                                                     | 3     | 1.5  | 4.86E-03 | 27.66           |
| GOTERM_BP_FAT   | GO:0032970~regulation of actin filament-based process                           | 6     | 2.9  | 4.93E-03 | 5.41            |
| SP_PIR_KEYWORDS | microsome                                                                       | 6     | 2.9  | 5.02E-03 | 5.42            |
| GOTERM_BP_FAT   | GO:0032535~regulation of cellular component size                                | 10    | 4.9  | 5.37E-03 | 3.06            |
| GOTERM_CC_FAT   | GO:0005792~microsome                                                            | 9     | 4.4  | 5.39E-03 | 3.35            |
| GOTERM_BP_FAT   | GO:0010551~regulation of specific transcription from RNA polymerase II promoter | 6     | 2.9  | 5.40E-03 | 5.30            |
| GOTERM_BP_FAT   | GO:0034754~cellular hormone metabolic process                                   | 5     | 2.5  | 5.41E-03 | 7.03            |
| UP_SEQ_FEATURE  | sequence variant                                                                | 144   | 70.6 | 5.52E-03 | 1.14            |
| GOTERM_MF_FAT   | GO:0048551~metalloenzyme inhibitor activity                                     | 3     | 1.5  | 5.61E-03 | 25.79           |
| GOTERM_MF_FAT   | GO:0010576~metalloenzyme regulator activity                                     | 3     | 1.5  | 5.61E-03 | 25.79           |
| GOTERM_MF_FAT   | GO:0008191~metalloendopeptidase inhibitor activity                              | 3     | 1.5  | 5.61E-03 | 25.79           |
| GOTERM_BP_FAT   | GO:0051051~negative regulation of transport                                     | 7     | 3.4  | 5.68E-03 | 4.30            |
| SP_PIR_KEYWORDS | nadp                                                                            | 7     | 3.4  | 5.88E-03 | 4.29            |
| UP_SEQ_FEATURE  | domain:Leucine-zipper                                                           | 6     | 2.9  | 6.02E-03 | 5.19            |
| INTERPRO        | IPR018170:Aldo/keto reductase, conserved site                                   | 3     | 1.5  | 6.25E-03 | 24.56           |
| GOTERM_BP_FAT   | GO:0045087~innate immune response                                               | 7     | 3.4  | 6.31E-03 | 4.21            |
| GOTERM_BP_FAT   | GO:0051094~positive regulation of developmental process                         | 10    | 4.9  | 6.31E-03 | 2.99            |
| GOTERM_CC_FAT   | GO:0042598~vesicular fraction                                                   | 9     | 4.4  | 6.39E-03 | 3.25            |
| GOTERM_BP_FAT   | GO:0042246~tissue regeneration                                                  | 4     | 2.0  | 6.48E-03 | 10.37           |

|                 |                                                         |    |     |          |       |
|-----------------|---------------------------------------------------------|----|-----|----------|-------|
| GOTERM_MF_FAT   | GO:0031406~carboxylic acid binding                      | 7  | 3.4 | 6.51E-03 | 4.18  |
| UP_SEQ_FEATURE  | site:Lowers pKa of active site Tyr                      | 3  | 1.5 | 6.71E-03 | 23.77 |
| UP_SEQ_FEATURE  | nucleotide phosphate-binding region:NADP                | 5  | 2.5 | 6.88E-03 | 6.60  |
| GOTERM_BP_FAT   | GO:0050878~regulation of body fluid levels              | 7  | 3.4 | 6.99E-03 | 4.12  |
| GOTERM_BP_FAT   | GO:0008217~regulation of blood pressure                 | 6  | 2.9 | 6.99E-03 | 4.98  |
| GOTERM_BP_FAT   | GO:0044087~regulation of cellular component biogenesis  | 7  | 3.4 | 7.23E-03 | 4.09  |
| GOTERM_BP_FAT   | GO:0010885~regulation of cholesterol storage            | 3  | 1.5 | 7.30E-03 | 22.63 |
| KEGG_PATHWAY    | hsa00250:Alanine, aspartate and glutamate metabolism    | 4  | 2.0 | 7.55E-03 | 9.65  |
| GOTERM_BP_FAT   | GO:0048584~positive regulation of response to stimulus  | 9  | 4.4 | 7.56E-03 | 3.17  |
| GOTERM_BP_FAT   | GO:0002684~positive regulation of immune system process | 9  | 4.4 | 7.93E-03 | 3.14  |
| GOTERM_BP_FAT   | GO:0006869~lipid transport                              | 7  | 3.4 | 7.98E-03 | 4.01  |
| GOTERM_BP_FAT   | GO:0050778~positive regulation of immune response       | 7  | 3.4 | 7.98E-03 | 4.01  |
| GOTERM_BP_FAT   | GO:0040008~regulation of growth                         | 11 | 5.4 | 8.00E-03 | 2.68  |
| GOTERM_BP_FAT   | GO:0048878~chemical homeostasis                         | 14 | 6.9 | 8.61E-03 | 2.27  |
| SP_PIR_KEYWORDS | innate immunity                                         | 5  | 2.5 | 8.89E-03 | 6.13  |
| GOTERM_BP_FAT   | GO:0030193~regulation of blood coagulation              | 4  | 2.0 | 9.01E-03 | 9.22  |
| GOTERM_BP_FAT   | GO:0034637~cellular carbohydrate biosynthetic process   | 5  | 2.5 | 9.37E-03 | 6.01  |
| GOTERM_MF_FAT   | GO:0005506~iron ion binding                             | 10 | 4.9 | 9.52E-03 | 2.79  |
| GOTERM_BP_FAT   | GO:0046364~monosaccharide biosynthetic process          | 4  | 2.0 | 9.72E-03 | 8.97  |
| GOTERM_BP_FAT   | GO:0006631~fatty acid metabolic process                 | 8  | 3.9 | 9.83E-03 | 3.35  |
| GOTERM_BP_FAT   | GO:0043408~regulation of MAPKKK cascade                 | 6  | 2.9 | 9.97E-03 | 4.57  |
| KEGG_PATHWAY    | hsa05200:Pathways in cancer                             | 11 | 5.4 | 9.99E-03 | 2.51  |

DAVID functional annotation chart with  $P < 0.01$  for DE genes in mesothelioma spheroids.
