# Supplementary material for: Analysis of Gene Expression in 3D Spheroids Highlights a Survival Role for ASS1 in Mesothelioma
Source: PubMed Central journal article supplement (PMC4794185; doi:10.1371/journal.pone.0150044), 2016-03-16
Supplement: pone.0150044.s007.pdf [file pone.0150044.s007.pdf]

| Non-epithelioid | Epithelioid |
|-----------------|-------------|
| 0.000           | 0.167       |
| 0.333           | 0.333       |
| 0.333           | 0.500       |
| 0.333           | 0.500       |
| 0.500           | 0.500       |
| 0.667           | 0.667       |
| 0.833           | 0.833       |
| 1.000           | 0.833       |
| 1.000           | 0.833       |
| 1.000           | 0.833       |
| 1.167           | 1.000       |
| 1.167           | 1.000       |
| 1.167           | 1.000       |
| 1.167           | 1.000       |
| 1.167           | 1.000       |
| 1.167           | 1.167       |
| 1.333           | 1.167       |
| 1.333           | 1.167       |
| 1.333           | 1.333       |
| 1.500           | 1.333       |
| 1.500           | 1.333       |
| 1.500           | 1.333       |
| 1.500           | 1.333       |
| 1.667           | 1.333       |
| 1.667           | 1.333       |
| 1.667           | 1.500       |
| 1.667           | 1.500       |
| 1.667           | 1.500       |
| 1.667           | 1.500       |
| 1.667           | 1.500       |
| 1.833           | 1.500       |
| 1.833           | 1.667       |
| 1.833           | 1.667       |
| 1.833           | 1.667       |
| 1.833           | 1.750       |
| 2.000           | 1.750       |
| 2.000           | 1.750       |
| 2.000           | 1.833       |
| 2.000           | 1.833       |
| 2.000           | 1.833       |
| 2.000           | 1.833       |
| 2.333           | 2.000       |
| 2.333           | 2.000       |
| 2.500           | 2.500       |
|                 | 2.500       |
|                 | 2.500       |
|                 | 2.667       |
|                 | 2.833       |

Mann Whitney test  
*Non-epithelioid vs epithelioid*  
P value 0.5662
